# Supplementary material
Source: PubMed Central journal article supplement (PMC3460449)
Supplement: supp_M112.361873_jbc.M112.361873-1.pdf [file supp_M112.361873_jbc.M112.361873-1.pdf]

## SUPPLEMENT

Regulator of G-Protein Signaling 3 isoform 1 (PDZ-RGS3) Enhances Canonical Wnt Signaling and Promotes Epithelial Mesenchymal Transition

**Chong-Shan Shi<sup>1</sup>, Ning-Na Huang<sup>1</sup>, and John H. Kehrl<sup>1,2</sup>**

<sup>1</sup>From the B-Cell Molecular Immunology Section, Laboratory of Immunoregulation, National Institute of Allergy and Infectious Disease, Bethesda, MD 20892, U.S.A

Running Title: *Canonical Wnt signaling and RGS3*

<sup>2</sup>Correspondence should be addressed to:

John H. Kehrl, B-Cell Molecular Immunology Section, Laboratory of Immunoregulation, National Institute of Allergy and Infectious Disease, 10 Center Drive, MSC 1876, Bethesda, MD 20892, U. S. A. Tel: 301-443-6907. E-mail: [jkehrl@niaid.nih.gov](mailto:jkehrl@niaid.nih.gov)

**Key words:** GSK3 $\beta$ , epithelial,  $\beta$ -catenin, RGS, signal transduction

Contents:

2 Figures labeled S1 and S2

Figure S1.

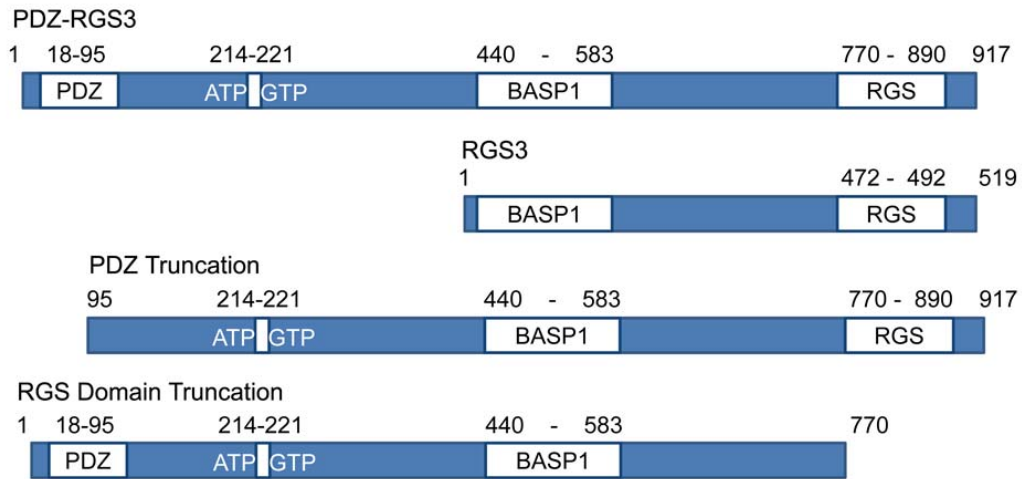

Figure S1. Schematic of RGS3 proteins.

Figure S2.

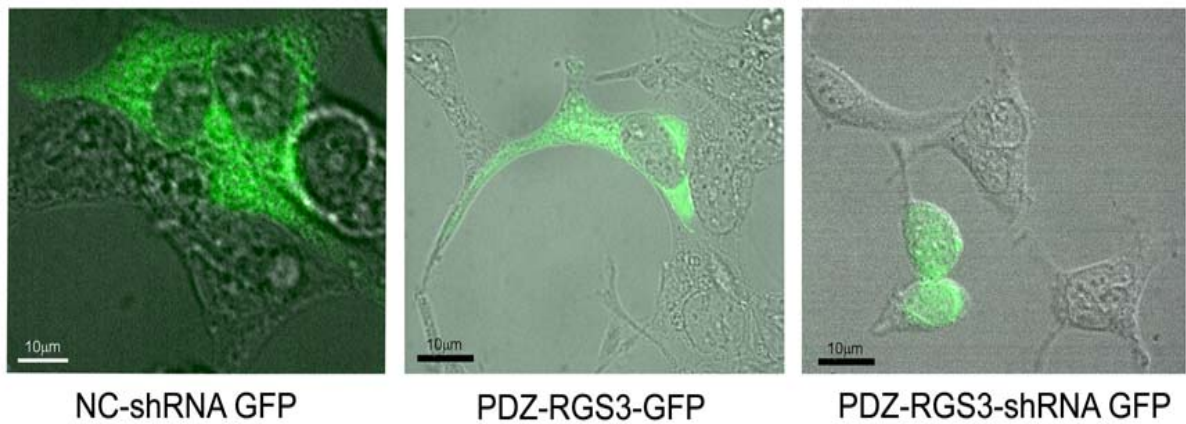

Figure S2. Altered morphology of HEK 293 cells following manipulation of PDZ-RGS3 expression. Shown are images of live HEK 293 cells transfected with the indicated plasmids the previous day. Each image is a superimposed bright field and confocal fluorescent image.
